# Supplementary material
Source: Elsevier journal article supplement (https://rcastoragev2.blob.core.windows.net/ef0ff42d5430596b55a6a0f14404d267/mmc1.pdf)

**Supplemental information**

**Receptor tyrosine kinases regulate signal  
transduction through a liquid-liquid phase  
separated state**

**Chi-Chuan Lin, Kin Man Suen, Polly-Anne Jeffrey, Lukasz Wieteska, Jessica A. Lidster, Peng Bao, Alistair P. Curd, Amy Stainthorp, Caroline Seiler, Hans Koss, Eric Miska, Zamal Ahmed, Stephen D. Evans, Carmen Molina-París, and John E. Ladbury**

## **SUPPLEMENTAL INFORMATION**

### **Receptor tyrosine kinases regulate signal transduction through a liquid–liquid phase separated state**

Chi-Chuan Lin, Kin Man Suen, Polly-Anne Jeffrey, Lukasz Wieteska, Jessica A. Lidster, Peng Bao, Alistair P. Curd, Amy Stainthorp, Caroline Seiler, Hans Koss, Eric Miska, Zamal Ahmed, Stephen D. Evans, Carmen Molina-París, and John E. Ladbury

Supplementary Figure 1

A

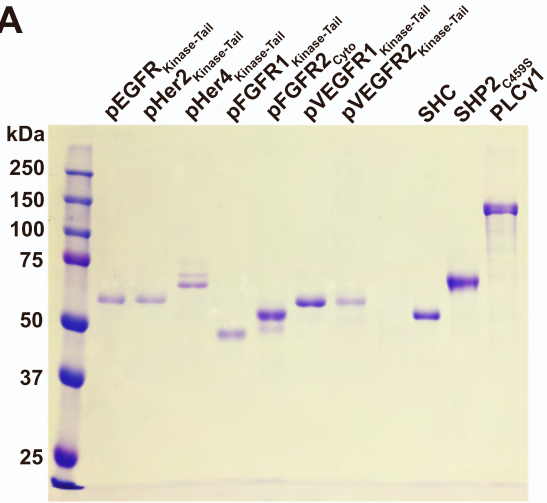

B

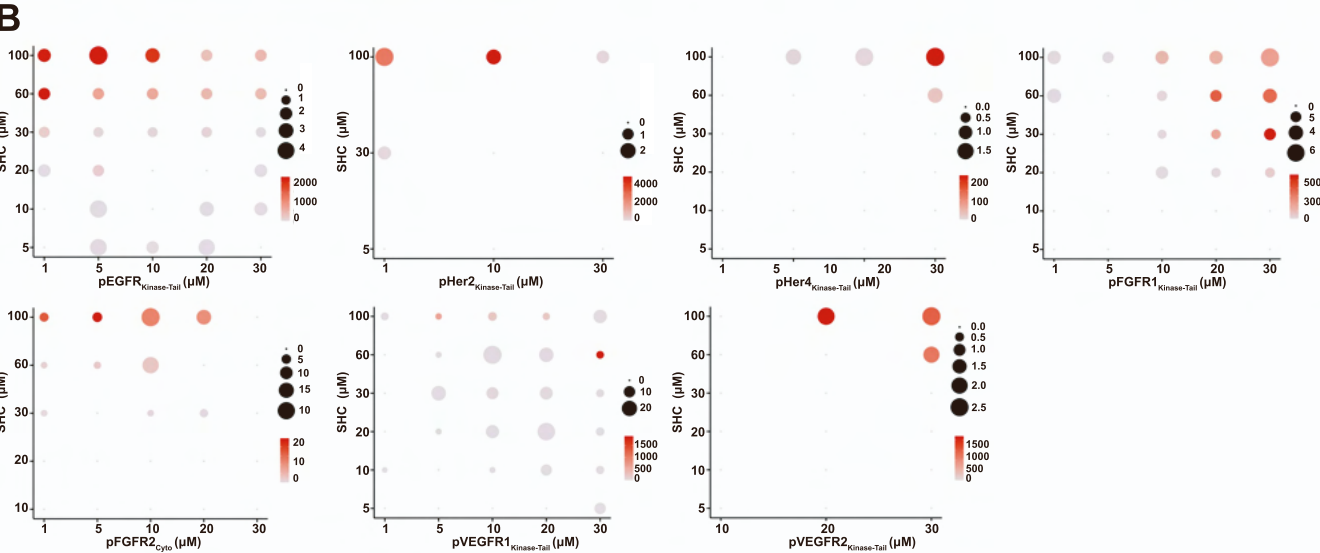

C

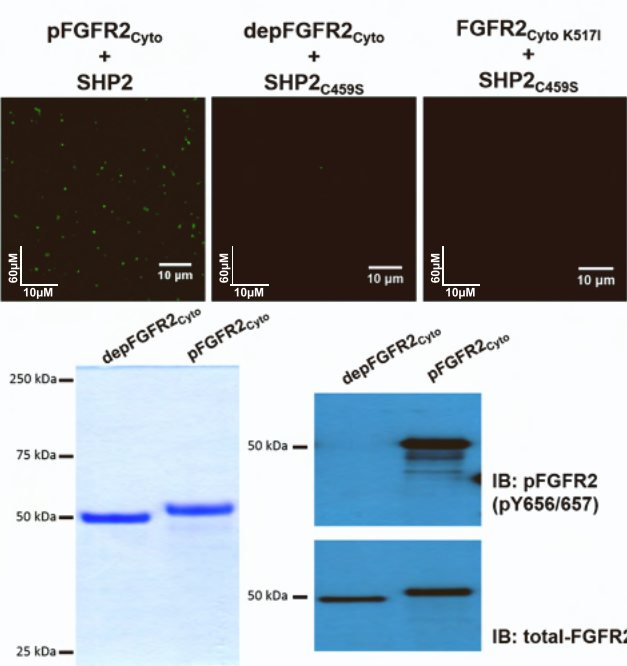

**Figure S1. Preparation of recombinant proteins and phosphorylation-dependent FGFR2-SHP2 droplet formation, Related to Figure 1.**

**(A)** Coomassie blue staining of purified recombinant proteins used in this study. Proteins were expressed and purified from *E.coli* (see Material and Methods) and the purity was greater than 95% examined by SDS-PAGE electrophoresis.

**(B)** Phase diagrams of phosphorylated EGFR, FGFR, and VEGFR family proteins (Atto-488 labelled) with concentrations shown in X-axis and SHC (Y-axis) in 20 mM HEPES (pH 7.5), 150 mM NaCl, and 1 mM TCEP. The sizes of the circles represent the average sizes of droplets ( $\mu\text{m}^2$ ) and the colour scale bars represent the numbers of droplets in a  $0.0256\text{ mm}^2$  area.

**(C)** (Top panel) Replacement of SHP2<sub>C459S</sub> with wild type SHP2 under identical conditions results in the reduction of droplet size. Unphosphorylated FGFR2<sub>Cyto</sub> (depFGFR2<sub>Cyto</sub> or FGFR2<sub>Cyto K517I</sub> (the kinase-dead mutant)) cannot form droplets with SHP2<sub>C459S</sub>. These images highlight the requirement for prolonged phosphorylation on FGFR2<sub>Cyto</sub> for droplet formation. (Below) The phosphorylation state of FGFR2<sub>Cyto</sub> was examined by a gel shift assay (left, coomassie blue staining) and an immunoblotting (right) using a specific phospho-antibody (pY656/657) against the activation loop of FGFR2.

## Supplementary Figure 2

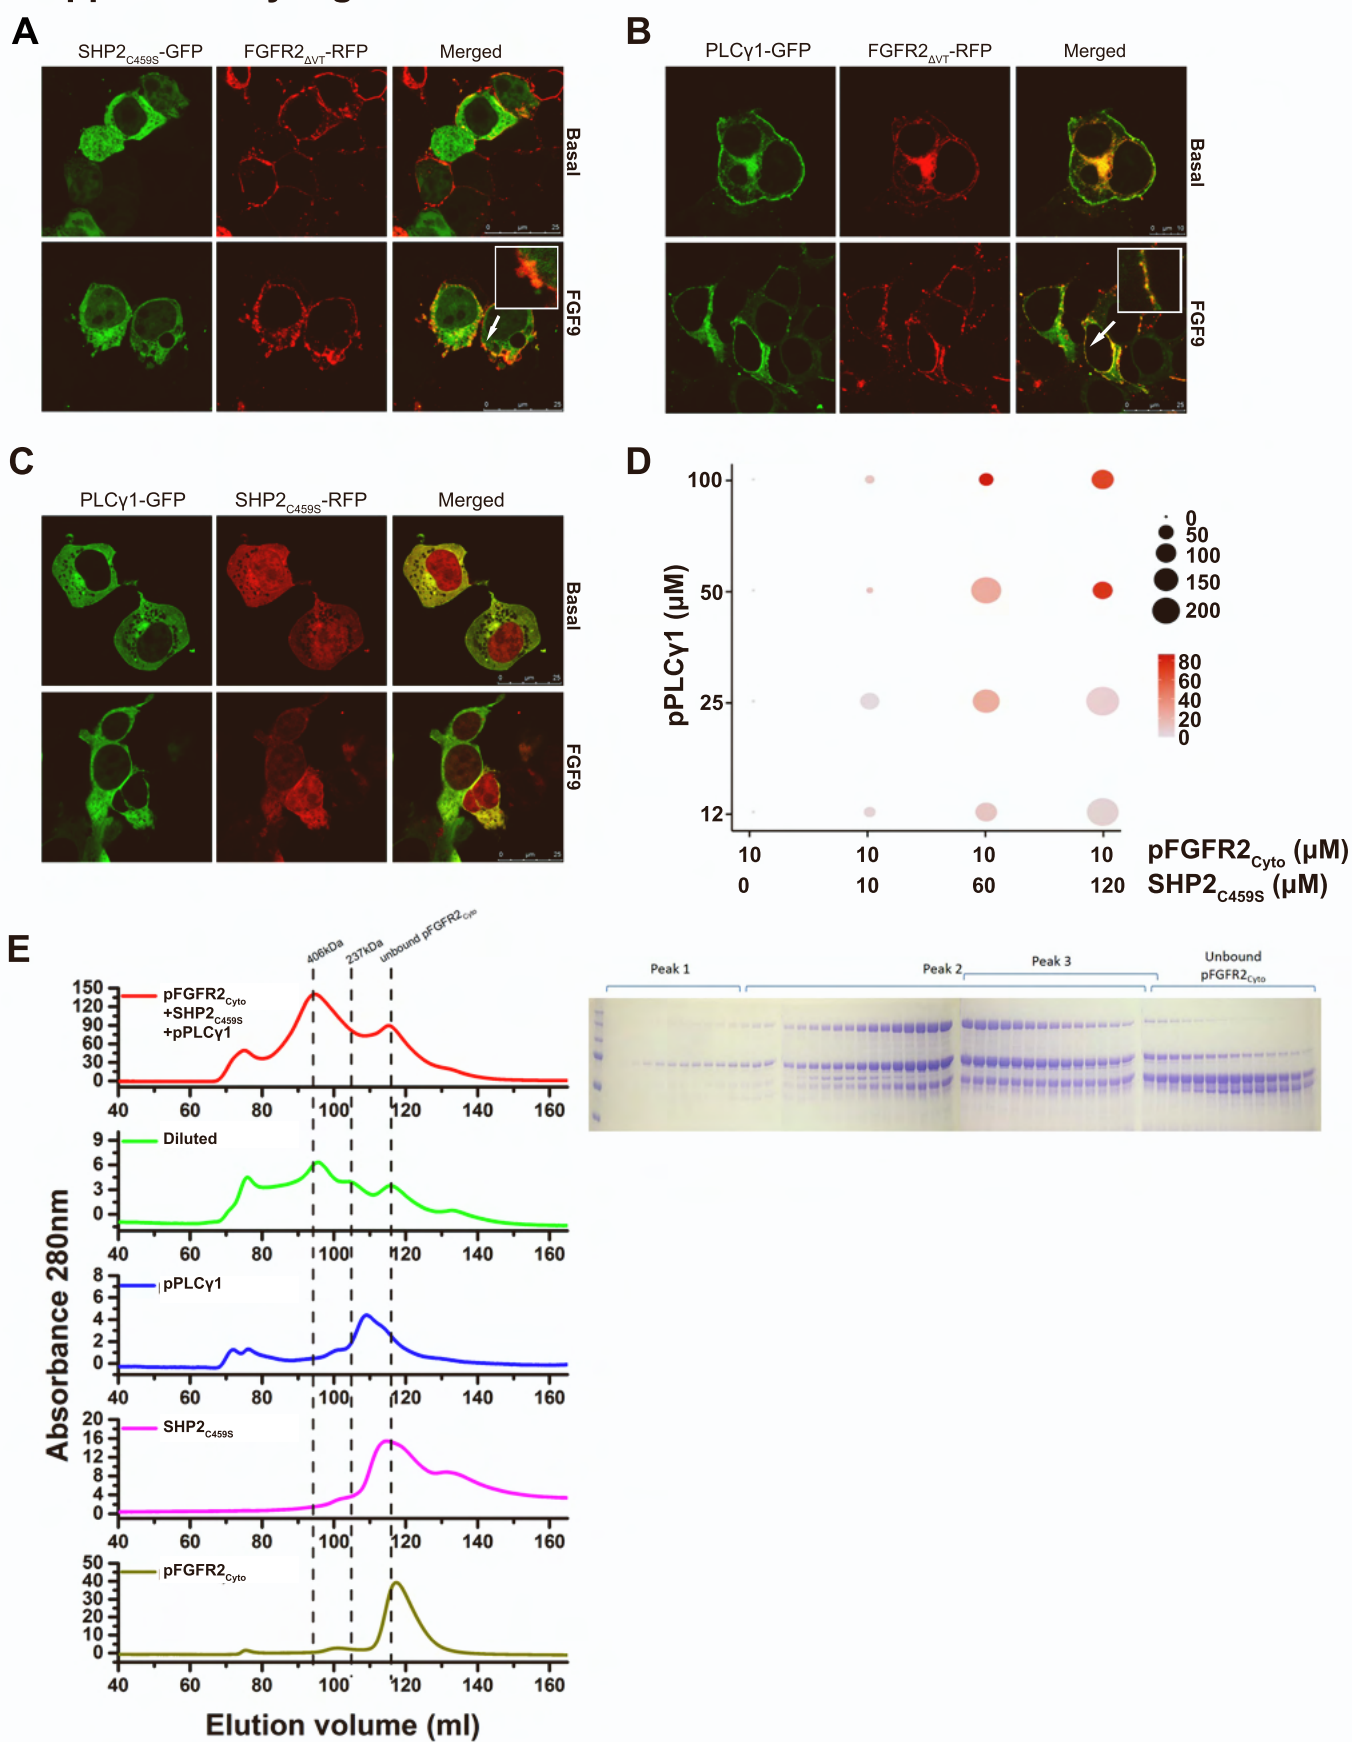

**Figure S2. FGFR2-SHP2-PLC $\gamma$ 1 complex formation in cells and *in vitro*, Related to Figure 2.**

**(A)** Cell images showing FGFR2 $\Delta$ VT-RFP and SHP2<sub>C459S</sub>-GFP cluster formation upon FGFR2 expression and activation (stimulated by FGF9) in HEK293T cells. Insets: magnification of regions shown by arrow to exemplify FGFR2 $\Delta$ VT-RFP and SHP2<sub>C459S</sub>-GFP clusters.

**(B)** Cell images showing FGFR2 $\Delta$ VT-RFP and PLC $\gamma$ 1-GFP cluster formation upon FGFR2 expression and activation (stimulated by FGF9) in HEK293T cells. Insets: magnification of regions shown by arrow to exemplify FGFR2 $\Delta$ VT-RFP and PLC $\gamma$ 1-GFP clusters.

**(C)** No evidence of SHP2 or PLC $\gamma$ 1 cluster formation in the absence of FGFR2 $\Delta$ VT; both SHP2 and PLC $\gamma$ 1 appear to randomly diffuse in cytosol.

**(D)** Phase diagrams of phosphorylated pFGFR2<sub>Cyto</sub>-SHP2<sub>C459S</sub>-pPLC $\gamma$ 1 in 20 mM HEPES (pH7.5), 150 mM NaCl, and 1 mM TCEP. pFGFR2<sub>Cyto</sub> was labelled with Atto 488, SHP2<sub>C459S</sub> was labelled with Atto 550 and pPLC $\gamma$ 1 was labelled with Atto 647. 10  $\mu$ M of pFGFR2<sub>Cyto</sub> was mixed with various concentrations of SHP2<sub>C459S</sub> (0, 10, 60, and 120  $\mu$ M) first before the addition of pPLC $\gamma$ 1 (from 100 – 12  $\mu$ M). The sizes of the circles represent the average sizes of droplets ( $\mu$ m<sup>2</sup>) and the colour scale bars represent the numbers of droplets in a 0.0256 mm<sup>2</sup> area. In the absence of SHP2<sub>C459S</sub>, pFGFR2<sub>Cyto</sub> does not form droplets with pPLC $\gamma$ 1.

**(E)** Size exclusion chromatography was used to isolate the pFGFR2<sub>Cyto</sub>-SHP2<sub>C459S</sub>-pPLC $\gamma$ 1 complex. The components of each elution fraction were examined by coomassie gel staining. A complex of greater than 1:1:1 of pFGFR2<sub>Cyto</sub>-SHP2<sub>C459S</sub>-pPLC $\gamma$ 1 ternary complex was observed with a calculated molecular weight of 406 kDa (peak 2). The binary pFGFR2<sub>Cyto</sub>-SHP2<sub>C459S</sub> complex was identified as peak 3 (237kDa).

## Supplementary Figure 3

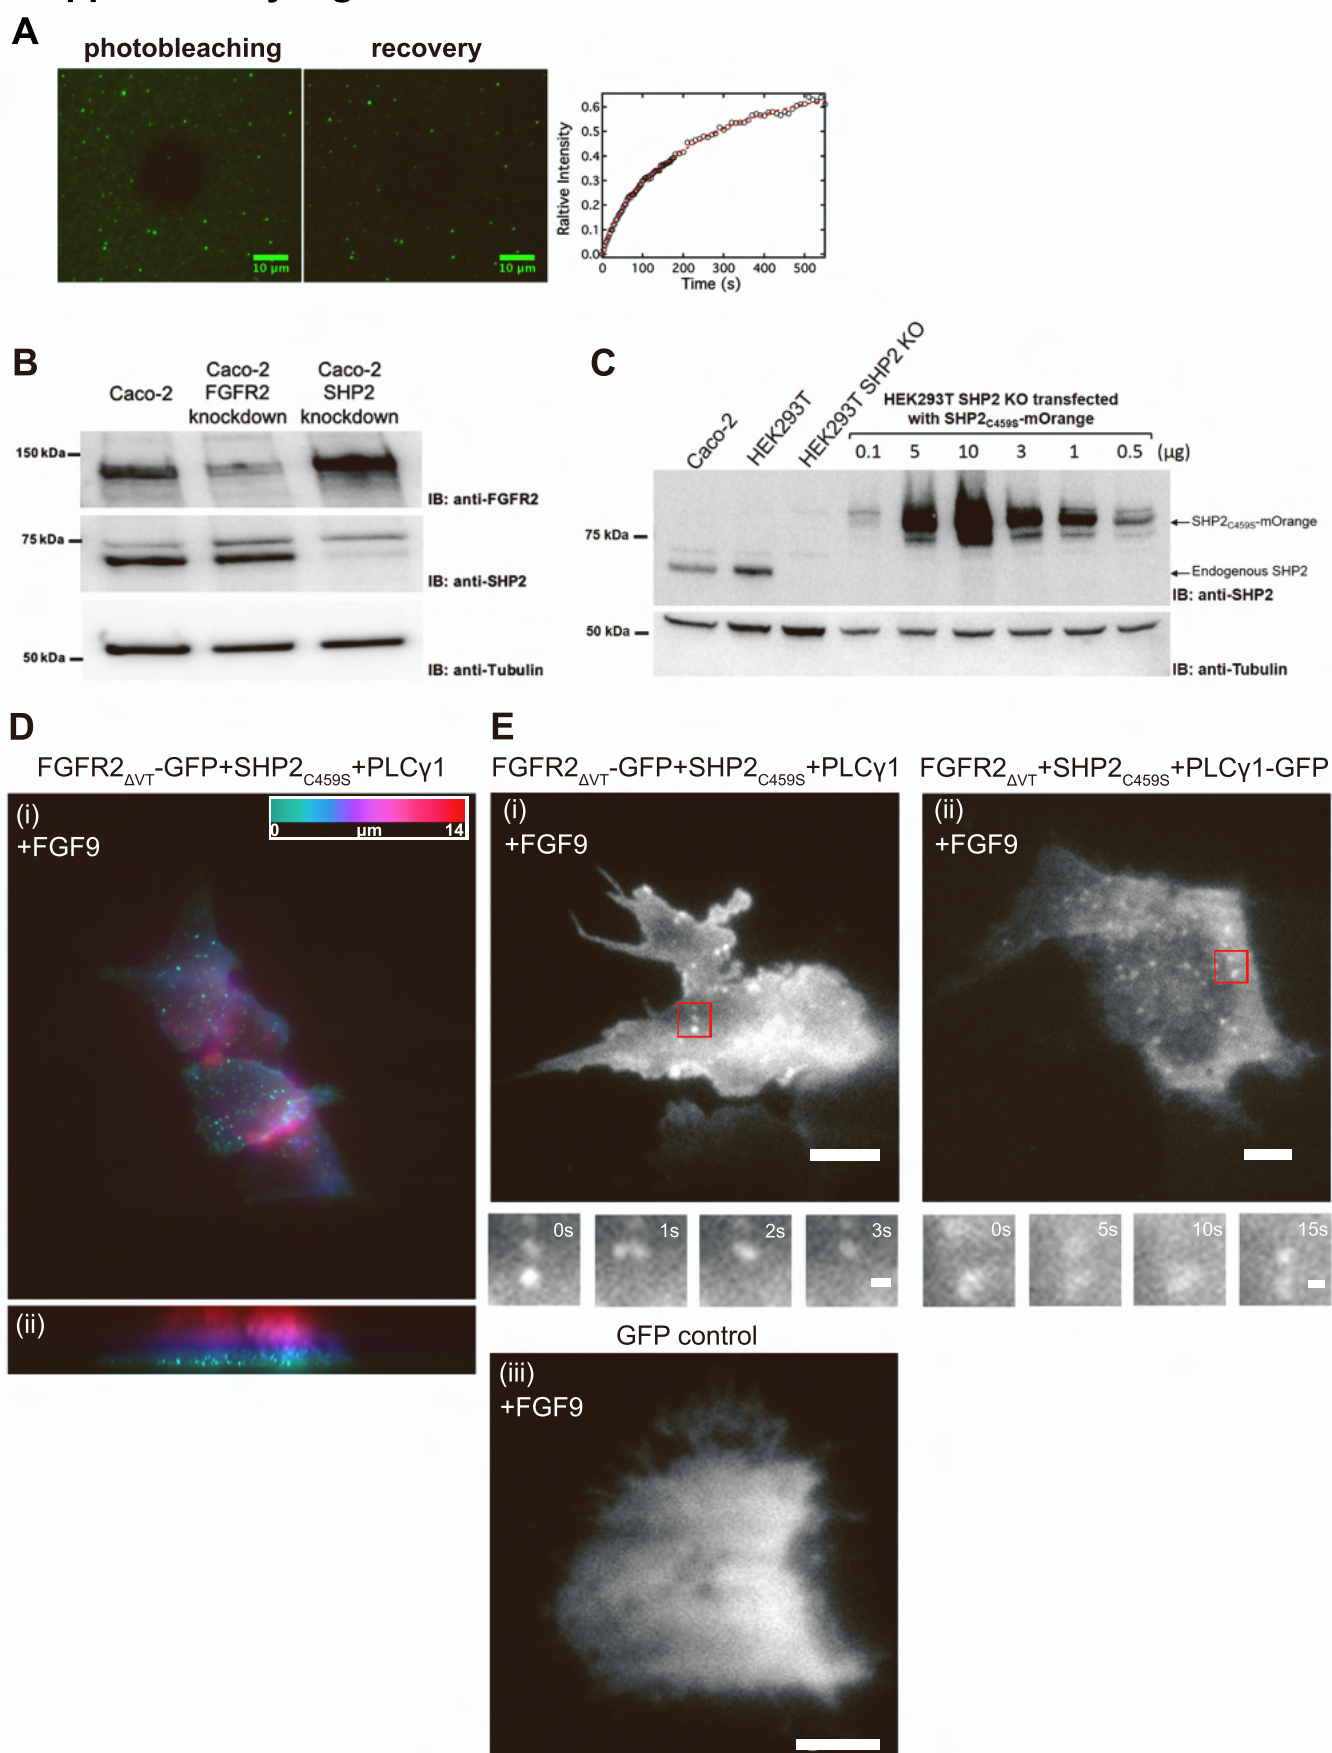

**Figure S3. The formation of FGFR2-SHP2-PLC $\gamma$ 1 complex on membranes, Related to Figure 3.**

**(A)** FRAP of pFGFR2<sub>Cyto</sub> (labelled with Atto 488) on supported lipid bilayers to demonstrate the liquid-like property. Left panel: photobleaching, middle panel: fluorescent recovery after bleaching, and right panel: real time quantification of FRAP data for pFGFR2<sub>Cyto</sub>.

**(B)** The knockdown levels of endogenous FGFR2 and SHP2 was examined by immunoblotting.

**(C)** The average exogenous expression level of SHP2<sub>C459S</sub> in HEK293T SHP2 KO cells was adjusted in order to mimic the endogenous SHP2 expression.

**(D)** HILO image showing that the FGFR2 $\Delta$ VT-EGFP droplets (coexpressed with untagged SHP2<sub>C459S</sub> and PLC $\gamma$ 1; stimulated with 10ng/ml FGF9) are localised close to the coverslip (improved contrast in HILO microscopy. Data were presented as depth-coded images ((i): XY view and (ii): XZ view), colour bar: 0-14 $\mu$ m. In the XZ view (ii), it is clear that many of the droplets, at different brightnesses, are visible along the flat line of the coverslip, and hence localised on the plasma membrane.

**(E)** HILO image showing that: (i) fusion event of FGFR2 $\Delta$ VT-EGFP droplets (coexpressed with untagged SHP2<sub>C459S</sub> and PLC $\gamma$ 1; stimulated with 10 ng/ml FGF9) on the membrane. The four time lapse images were monitored from the red box shown in the whole cell image. Scale bar for the whole cell image: 5  $\mu$ m; scale bar for the time lapse image: 500 nm. (ii) fusion/fission event of PLC $\gamma$ 1-EGFP droplets (coexpressed with untagged FGFR2 $\Delta$ VT and SHP2<sub>C459S</sub>; stimulated with 10 ng/ml FGF9) on the membrane. The four time lapse images were monitored from the red box shown in the whole cell image. Scale bar for the whole cell image: 5  $\mu$ m; scale bar for the time lapse image: 500 nm. (iii) EGFP alone control. No droplet formation. Scale bar: 5  $\mu$ m



Supplementary Figure 4

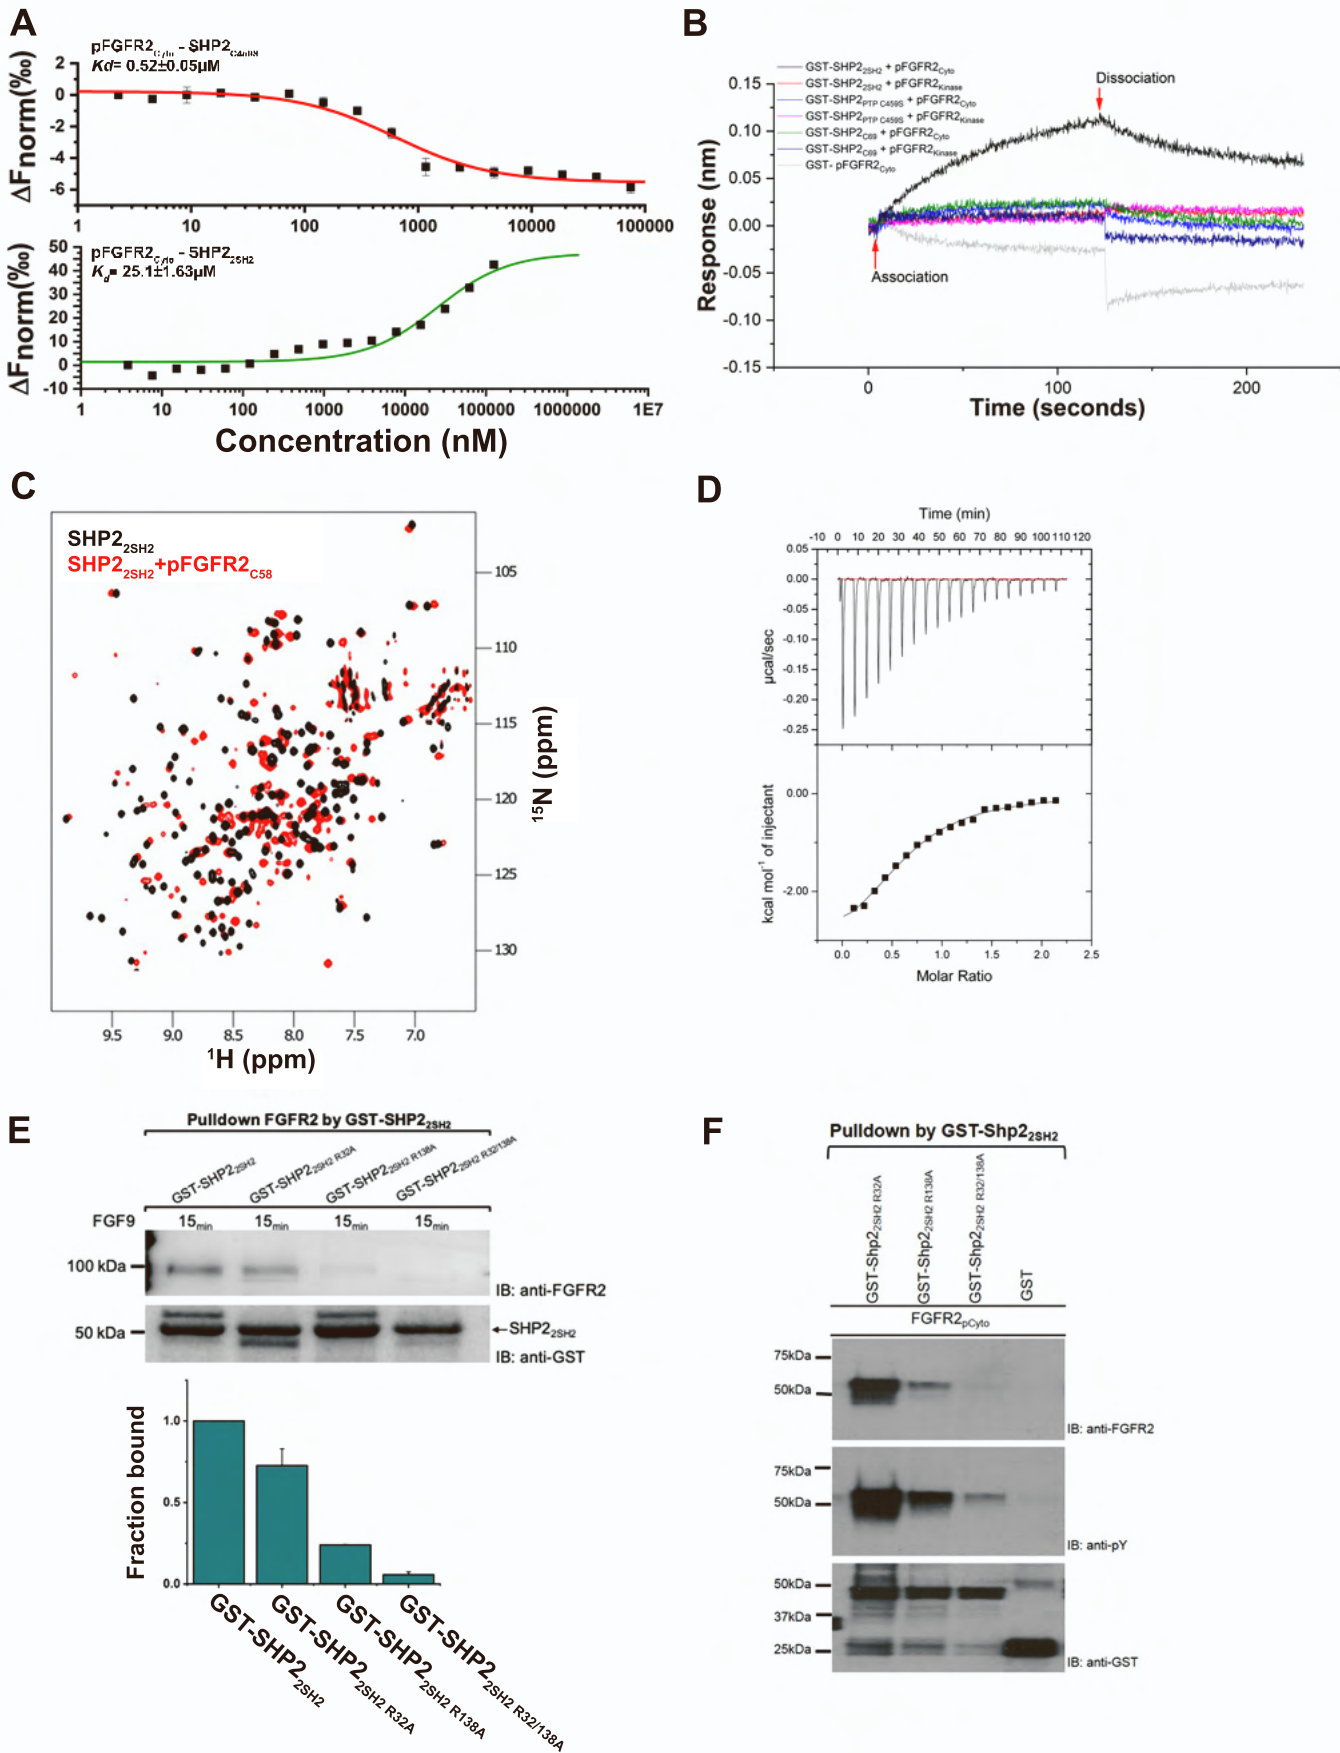

**Figure S4. The molecular interaction of FGFR2 with SHP2, Related to Figure 4.**

**(A)** MST isotherm for the binding of pFGFR2<sub>Cyto</sub> to full length SHP2<sub>C459S</sub> ( $K_d = 0.52 \pm 0.0 \mu\text{M}$ ; red curve) or the truncated tandem SH2 domain SHP2<sub>2SH2</sub> ( $K_d = 25.1 \pm 1.63 \mu\text{M}$ ; green curve).

**(B)** BLI experiments were used to confirm the phosphorylation-dependent interaction and the specific domains required for binding. GST-SHP2<sub>2SH2</sub>, GST-SHP2<sub>PTP C459S</sub> and GST-SHP2<sub>C69</sub> were immobilized on GST sensors and pFGFR2<sub>Cyto</sub> (5  $\mu\text{M}$ ) and pFGFR2<sub>Kinase</sub> (5  $\mu\text{M}$ ) were used to test the binding. pFGFR2<sub>Cyto</sub> clearly interacts with GST-SHP2<sub>2SH2</sub>. The expected weak binding to pFGFR2<sub>Kinase</sub> is not visible due to the concentration of this reagent being below the  $K_d$  for the interaction. Black - immobilized GST-SHP2<sub>2SH2</sub> with pFGFR2<sub>Cyto</sub>; red - immobilized GST-SHP2<sub>2SH2</sub> with pFGFR2<sub>Kinase</sub>; blue - immobilized GST-SHP2<sub>PTP C459S</sub> with pFGFR2<sub>Cyto</sub>; pink - immobilized GST-SHP2<sub>PTP C459S</sub> with pFGFR2<sub>Kinase</sub>; green - immobilized GST-SHP2<sub>C69</sub> with pFGFR2<sub>Cyto</sub>; dark blue - immobilized GST-SHP2<sub>C69</sub> with pFGFR2<sub>Kinase</sub>; grey - immobilized GST with pFGFR2<sub>Cyto</sub>. Ligand-analyte association (0 sec) and dissociation (buffer washing, 120 sec) are indicated by red arrows.

**(C)** NMR spectra of  $^1\text{H}$ ,  $^{15}\text{N}$ -labelled isolated SHP2<sub>2SH2</sub> (100  $\mu\text{M}$ , black) and with added pFGFR2<sub>C58</sub> (300  $\mu\text{M}$ , red). The chemical shifts for individual residues (i.e. movement of peaks from black to red positions) confirm direct interaction across a broad interface.

**(D)** Binding of SHP2<sub>2SH2</sub> (10  $\mu\text{M}$ ) with the pFGFR2<sub>C58</sub> (100  $\mu\text{M}$ ) shown by ITC. The top panel shows raw data for the titration; the bottom panel shows integrated peaks plotted on axes with molar heat of binding versus the molar ratio of titrated protein fitted to a single-site binding model. Heats of dilution were measured in a separate control experiment and subtracted from binding data prior to fitting. Importantly the stoichiometry of the interaction 1:1 confirms that only CSH2 from the tandem SH2 domains recognizes pY769 on the receptor.

**(E)** (Top) GST-SHP2<sub>2SH2</sub>, GST-SHP2<sub>2SH2 R32A</sub>, GST-SHP2<sub>2SH2 R138A</sub> and GST-SHP2<sub>2SH2 R32/138A</sub> were used to pull down FGFR2 $\Delta\text{VT}$  from HEK293T cells stimulated with FGF9 (10 ng/ml). Mutation of R138 abrogates binding of FGFR2 confirming the requirement of the wild type

CSH2 domain for binding to receptor. (Bottom) Densitometry analysis of GST pull down. n=2. Data were presented as mean  $\pm$  SD. Replicate data shown in Data S1E.

**(F)** GST-SHP2<sub>2SH2</sub> R32A, GST-SHP2<sub>2SH2</sub> R138A and GST-SHP2<sub>2SH2</sub> R32/138A were used to pull down recombinant pFGFR2<sub>Cyto</sub>. Mutation of R138 abrogates binding of FGFR2 confirming the requirement of a wild type CSH2 domain for binding to receptor.

Supplementary Figure 5

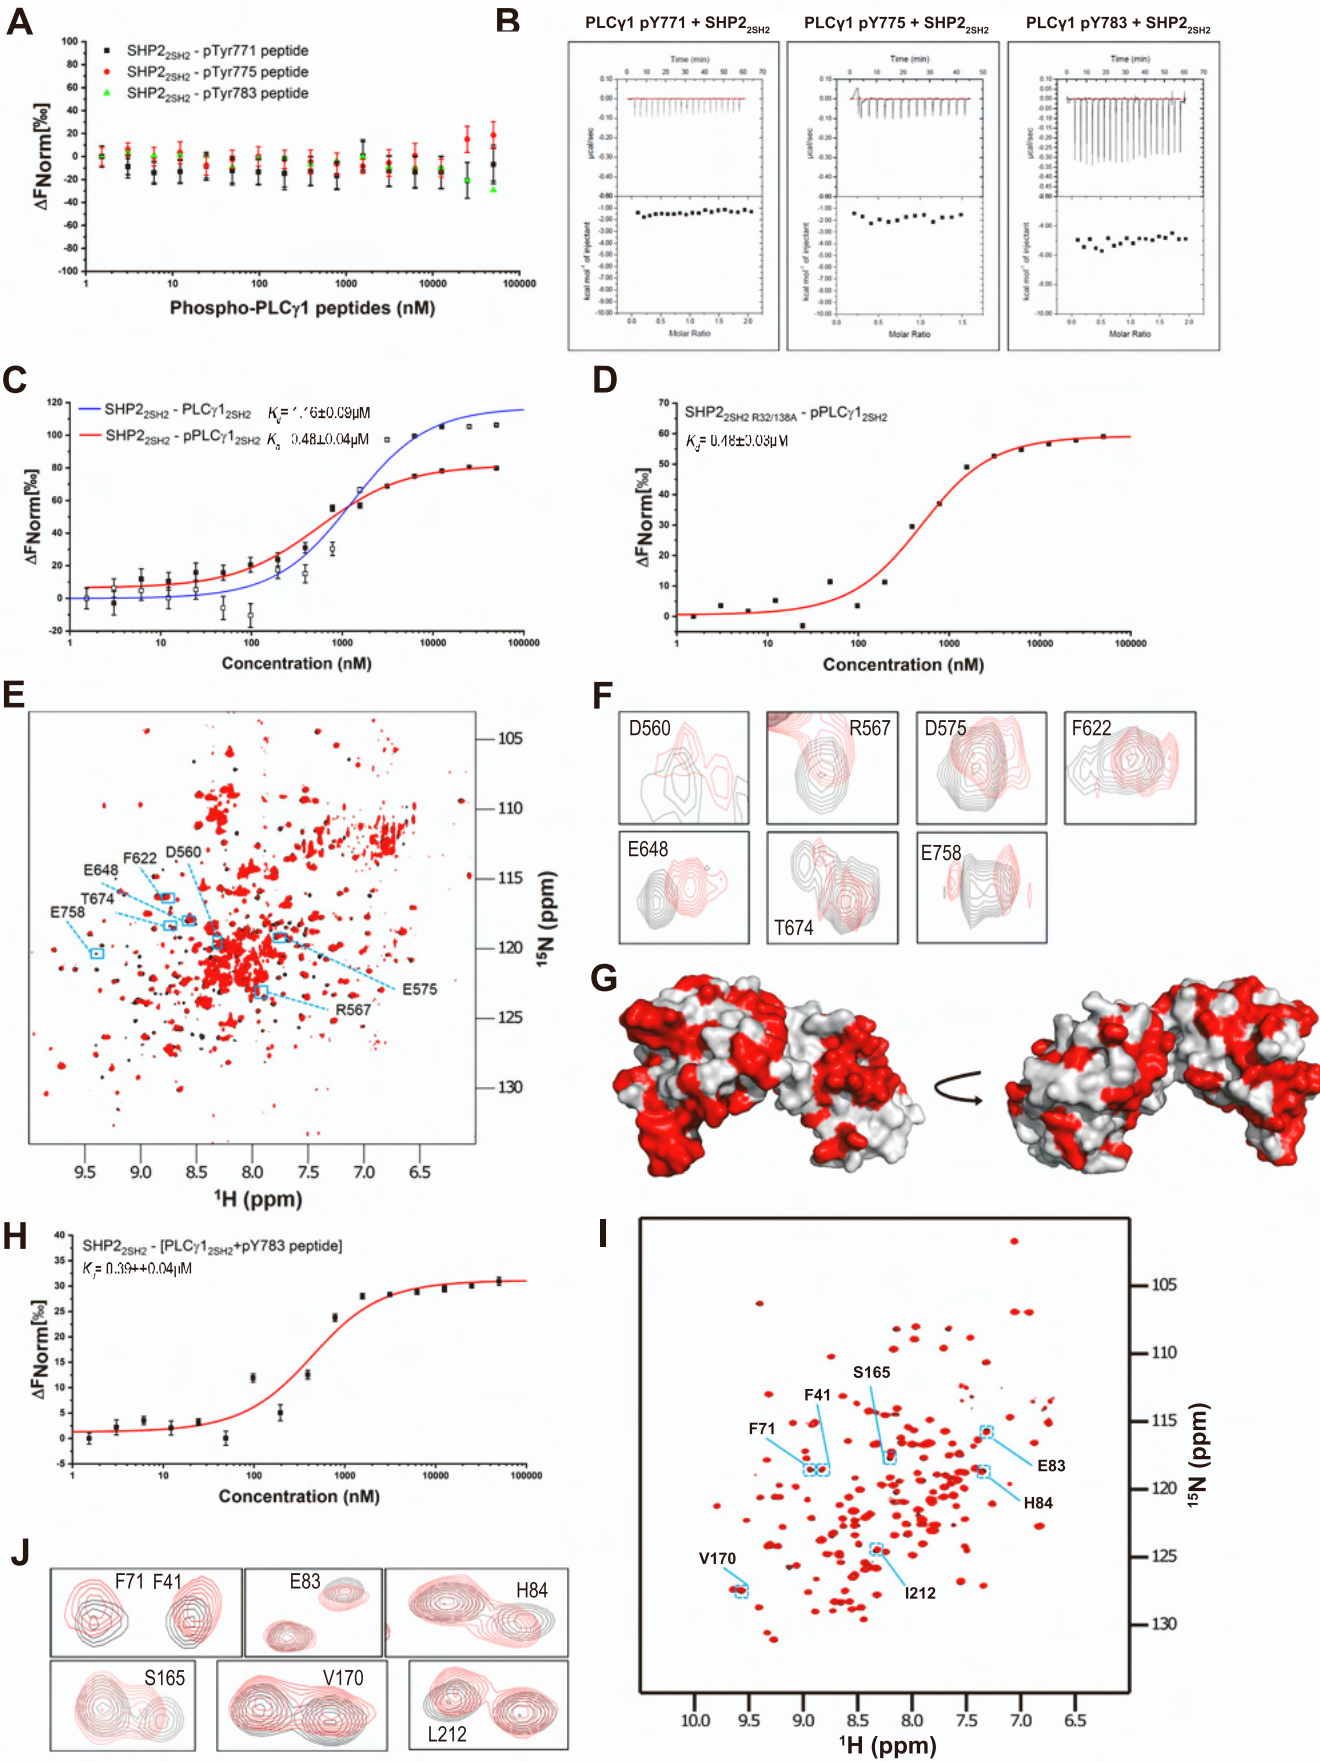

**Figure S5. The molecular interaction of SHP2 with PLCy1, Related to Figure 5.**

**(A)** MST isotherm for the binding of synthesized PLCy1-derived tyrosyl phosphopeptides containing pY771, pY775 or pY783 to labelled SHP2<sub>2SH2</sub>. No significant interaction was found with any of the phosphopeptides.

**(B)** ITC isotherms of SHP2<sub>2SH2</sub> binding to PLCy1 pY771, pY775, and pY783 tyrosyl phosphopeptides. Twenty 3 µl injections of each phosphopeptide (100 µM) were titrated into SHP2<sub>2SH2</sub> (10 µM) at 25°C. Top, baseline-corrected power-versus-time plot for the titration. Bottom, integrated heats and curve fitting using Origin™ software.

**(C)** MST measurement of SHP2<sub>2SH2</sub> binding to labelled PLCy1<sub>2SH2</sub>, blue curve; or labelled pPLCy1<sub>2SH2</sub>, red curve. No significant difference was observed in their binding affinities to SHP2<sub>2SH2</sub>.

**(D)** MST isotherm for the interaction of labelled SHP2<sub>2SH2</sub> R32/138A mutant and pPLCy1<sub>2SH2</sub>, showing that the interaction is not based on the canonical binding of pY to an SH2 domain.

**(E)** NMR <sup>1</sup>H and <sup>15</sup>N chemical shift changes on addition of SHP2<sub>2SH2</sub> (600 µM) to <sup>15</sup>N-labelled PLCy1<sub>2SH2</sub> (200 µM). Blue squares highlight some of the residues on the spectrum showing shift changes; which are magnified in (F).

**(G)** <sup>1</sup>H, <sup>15</sup>N peak assignments mapped onto the space-filling model crystal structure of PLCy1<sub>2SH2</sub> (PDB code: 4FBN). The orientations of the structure are as shown in Fig. 5B. The coverage of assigned residues of PLCy1<sub>2SH2</sub> is 46.5% (red, assigned residues).

**(H)** MST isotherm for the interaction of labelled SHP2<sub>2SH2</sub> and a preformed complex between PLCy1<sub>2SH2</sub> and a tyrosyl phosphopeptide containing pY783 showing that the binding of pY783 does not hinder the tandem SH2 domain interface.

**(I)** NMR <sup>1</sup>H and <sup>15</sup>N chemical shift changes on addition of PLCy1<sub>2SH2</sub> (600 µM) to <sup>15</sup>N-labelled SHP2<sub>2SH2</sub> (100 µM). Blue squares highlight some of the residues on the spectrum showing shift changes; which are expanded in (J).

## A

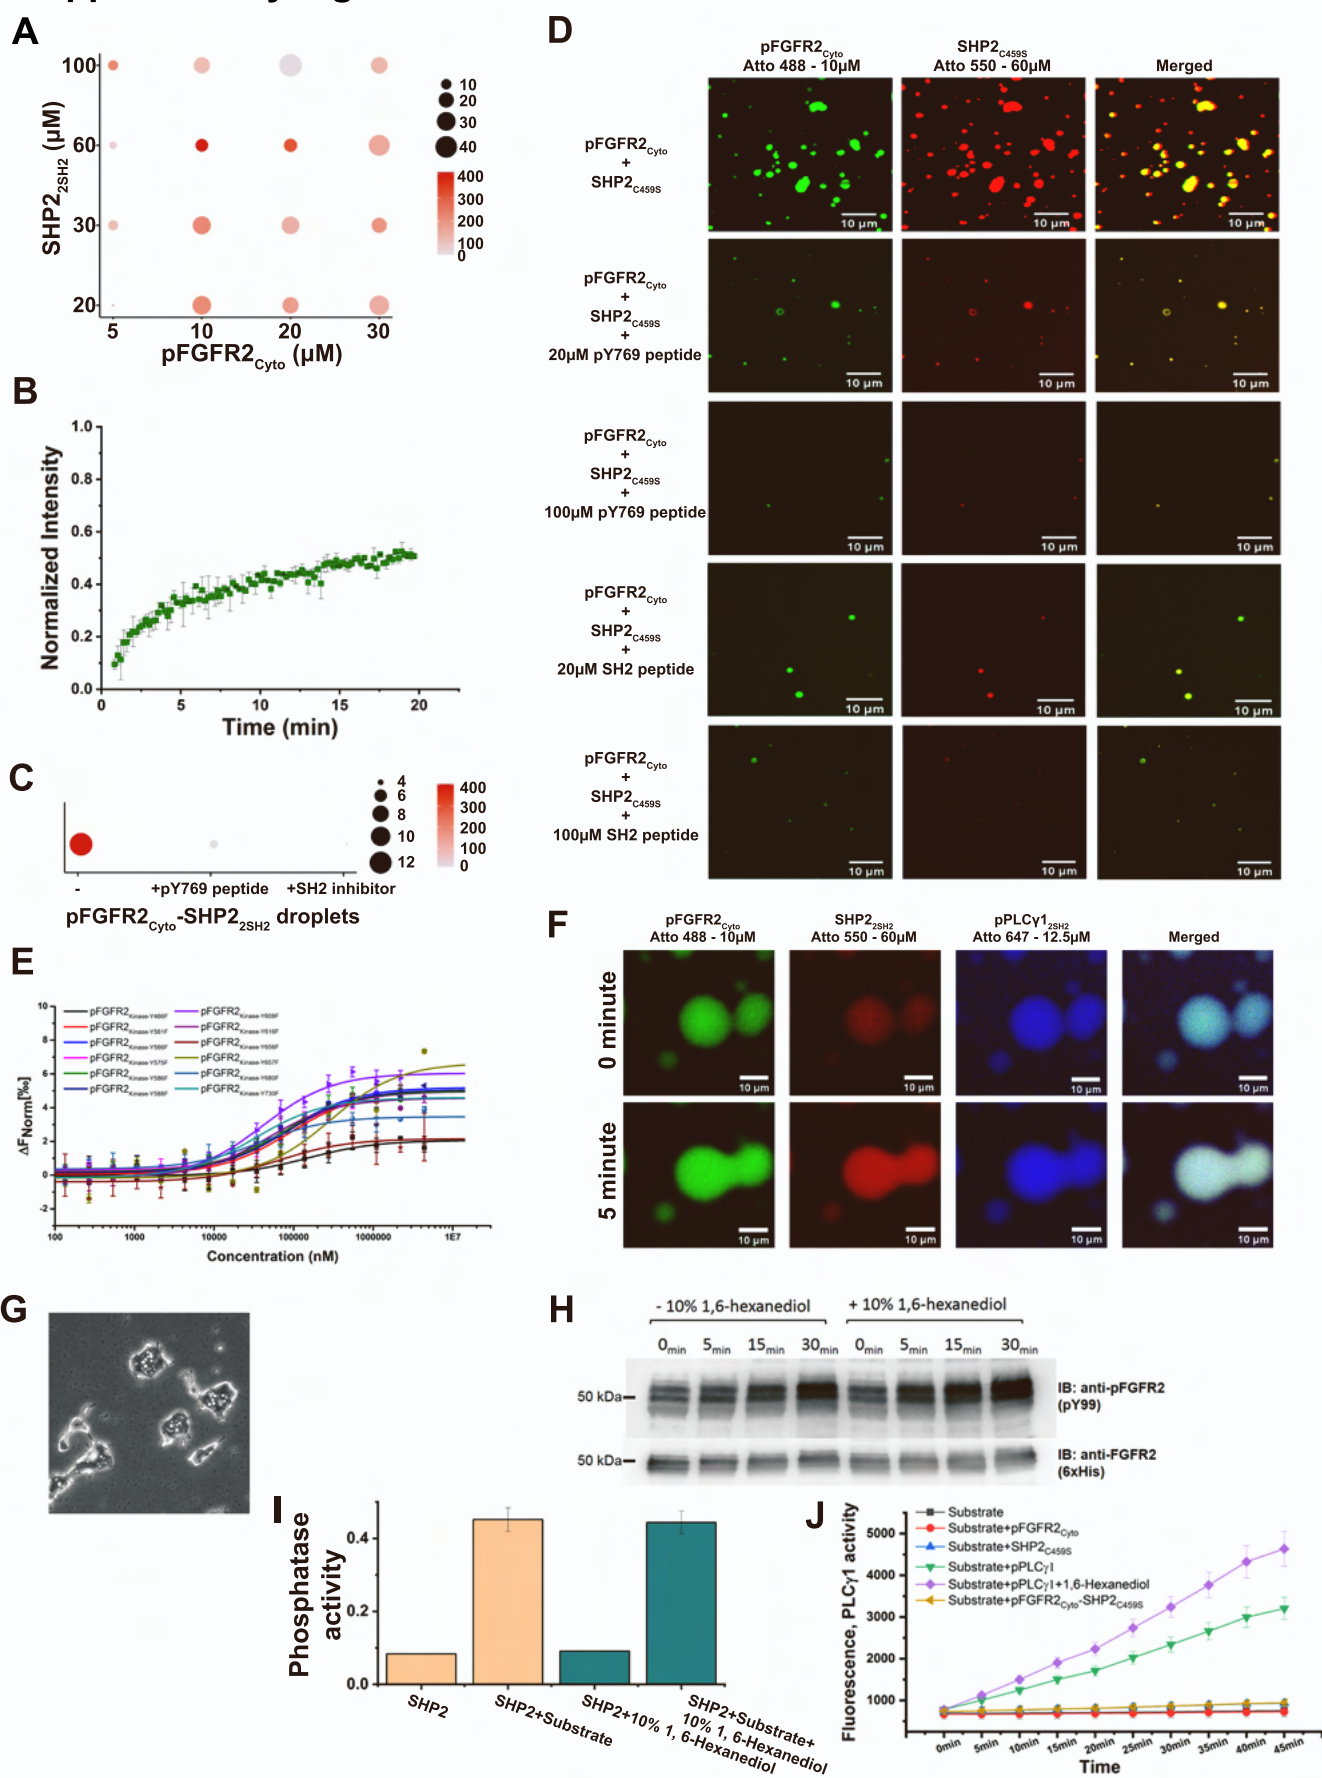

**Figure S6. Characterization of FGFR2-SHP2-PLC $\gamma$ 1 droplets properties, Related to Figure 6.**

**(A)** Phase diagram of pFGFR2<sub>Cyto</sub>-Atto 488 and SHP2<sub>2SH2</sub>-Atto 550 droplet formation in a buffer containing 20 mM HEPES (pH7.5), 150 mM NaCl, and 1 mM TCEP. The sizes of the circles represent the average sizes of droplets ( $\mu\text{m}^2$ ) and the colour scale bars represent the numbers of droplets in a 0.0256 mm<sup>2</sup> area.

**(B)** FRAP recovery curve for pFGFR2<sub>Cyto</sub>-Atto 488 and SHP2<sub>2SH2</sub> (means  $\pm$  SD, n = 2 experiments).

**(C)** Phase diagram of pFGFR2<sub>Cyto</sub>-Atto 488 and SHP2<sub>2SH2</sub>-Atto 550 droplet formation with 20  $\mu\text{M}$  of pY769 peptide and SH2 inhibitor peptide in a buffer containing 20 mM HEPES (pH7.5), 150 mM NaCl, and 1 mM TCEP. The addition of both inhibitor abolishes the formation of droplets. The sizes of the circles represent the average sizes of droplets ( $\mu\text{m}^2$ ) and the colour scale bars represent the numbers of droplets in a 0.0256 mm<sup>2</sup> area.

**(D)** Inhibition of pFGFR2<sub>Cyto</sub>-Atto 488 (10  $\mu\text{M}$ ) and SHP2<sub>C459S</sub>-Atto 550 (30  $\mu\text{M}$ ) droplet formation by 20  $\mu\text{M}$  or 100  $\mu\text{M}$  of pY769 peptide or SH2 inhibitor peptide. Scale bar = 10  $\mu\text{m}$ .

**(E)** MST measurements of SHP2<sub>2SH2</sub> R138A binding to pFGFR2<sub>Kinase</sub> with single Y to F mutants of all of the individual tyrosines on the kinase domain. This result shows multivalent, weak binding between SHP2 NSH2 domain and any of the available pY residues.

**(F)** The dynamic LLPS property of pFGFR2<sub>Cyto</sub> (10  $\mu\text{M}$ )-SHP2<sub>2SH2</sub> (30  $\mu\text{M}$ )-PLC $\gamma$ 1<sub>2SH2</sub> (12  $\mu\text{M}$ ) droplets was monitored by the fusion experiment. This experiment demonstrated the tandem SH2 domains of SHP2 and PLC $\gamma$ 1 are the minimum requirement to form LLPS droplets with pFGFR2<sub>Cyto</sub>. Scale bar = 10  $\mu\text{m}$ .

**(G)** The white light image of pFGFR2<sub>Cyto</sub>-SHP2-PLC $\gamma$ 1 droplets used for enzymatic assay.

**(H)** Purified pFGFR2<sub>Cyto</sub> (10  $\mu\text{M}$ ) was incubated with ATP/MgCl<sub>2</sub> (5 mM) in the presence or absence of 10% 1,6-hexanediol in a buffer containing 20 mM HEPES (pH7.5), 150 mM NaCl,

and 1 mM TCEP. The effect of 1,6-hexanediol on pFGFR2<sub>Cyto</sub> activity was monitored by pFGFR2 immunoblotting at different time points as indicated. This result demonstrated that 10% 1,6-hexanediol does not affect kinase activity in the LLPS condition.

**(I)** Purified SHP2 (60  $\mu$ M) was incubated with a phospho-substrate (Methods: *In vitro* phosphatase assay) in the presence or absence of 10% 1,6-hexanediol in a buffer containing 20 mM HEPES (pH7.5), 150 mM NaCl, and 1 mM TCEP. The effect of 1,6-hexanediol on SHP2 activity was monitored by the turnover rate of the substrate. This result demonstrated that 10% 1,6-hexanediol does not affect phosphatase activity in the LLPS condition. n=2. Data were presented as mean  $\pm$  SD.

**(J)** Purified pFGFR2<sub>Cyto</sub> (10  $\mu$ M), SHP2<sub>C459S</sub> (60  $\mu$ M), and pPLC $\gamma$ 1 (50  $\mu$ M) were incubated with artificial pPLC $\gamma$ 1 substrate 4-methylumbelliferyl myo-inositol-1-phosphate, N-methyl-morpholine salt in a buffer containing 20mM HEPES (pH7.5), 150mM NaCl, and 1mM TCEP to test the specificity of pFGFR2<sub>Cyto</sub>, SHP2<sub>C459S</sub>, and pPLC $\gamma$ 1 with the substrate. SHP2<sub>C459S</sub> shows a low level of nonspecific reaction (blue and brown curves). The addition of 10% 1,6-hexanediol upregulates pPLC $\gamma$ 1 activity (purple curve) comparing with pPLC $\gamma$ 1 alone (green curve). Sample sizes = 8, Data were presented as mean  $\pm$  SD.



Supplementary Figure 7

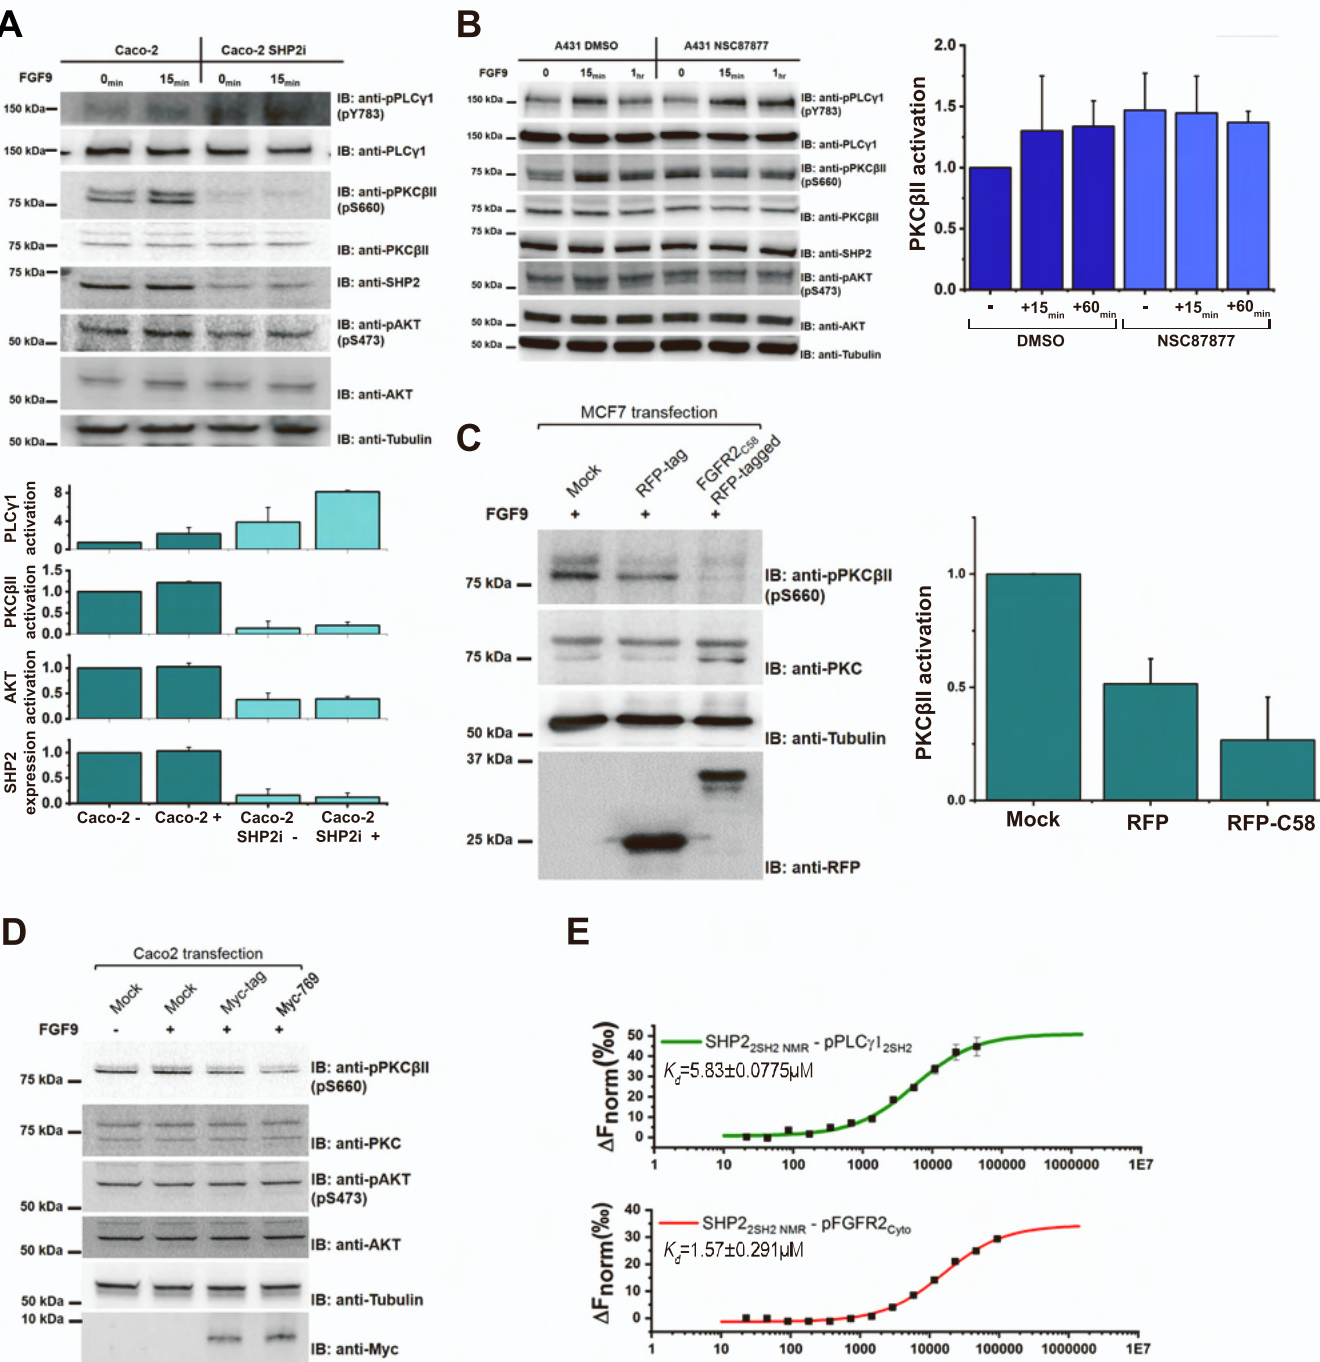

**Figure S7. FGFR2-SHP2-PLC $\gamma$ 1 signalling regulated by phase separation, Related to Figure 7.**

**(A)** (Top) Western blot showing Caco-2 cells with knock down of SHP2 (Caco-2 SHP2i). As seen in MCF7 SHP2 KO and A431 SHP2i cells the phosphorylation of PLC $\gamma$ 1 Y783 is increased on FGF9 stimulation (10 ng/ml) of FGFR2. Phosphorylation of S660 on PKC $\beta$ II and S473 on AKT act as markers for up-regulation of PLC $\gamma$ 1 signalling. This is suppressed in the absence of SHP2 in the Caco-2 SHP2i cells. (Bottom) Densitometry analysis of SHP2 expression and the activation levels of various signalling proteins (dark cyan: parental cells; light cyan: SHP2 depletion cells).  $n=2$ . Data were presented as mean  $\pm$  SD. Replicate data shown in Data S3D.

**(B)** (Left) Western blot showing the presence of phosphorylated downstream effector proteins in A431 cells without (using only DMSO vehicle) or with 50  $\mu$ M of NSC87877 SHP2 inhibitor. The negligible change of phosphorylation of PKC $\beta$ II and AKT upon FGF9 stimulation (10 ng/ml) shows that SHP2 phosphatase activity does not affect PLC $\gamma$ 1 activity. (Right) Densitometry analysis of the activation levels of various signalling proteins (dark blue: DMSO treatment; light blue: NSC87877 SHP2 inhibitor treatment).  $n=3$ . Data were presented as mean  $\pm$  SD. Replicate data shown in Data S3E.

**(C)** (Left) Transfection of RFP-tagged FGFR2<sub>C58</sub> to FGF9-stimulated (10 ng/ml) MCF7 cells results in the down regulation of PKC $\beta$ II activity. (Right) Densitometry analysis of PKC $\beta$ II activity.  $n=3$ . Data were presented as mean  $\pm$  SD. Replicate data shown in Data S3F.

**(D)** Transfection of Myc-tagged FGFR2 pY769 peptide to Caco-2 cells followed by stimulation of FGF9 (10 ng/ml) results in the down regulation of PKC $\beta$ II activity, but has no effect on AKT activity.

**(E)** MST isotherm for the binding of SHP2<sub>2SH2</sub> NMR. The mutations on the interface decrease the interaction with pPLC $\gamma$ 1<sub>2SH2</sub> with an affinity of  $5.83 \pm 0.077$   $\mu$ M (green curve) compared with wild

type SHP2<sub>2SH2</sub> ( $K_d = 0.48 \pm 0.04 \mu\text{M}$ ; Fig. S5C), but it does not affect the interaction with pFGFR2<sub>Cyto</sub> ( $K_d = 15.7 \pm 0.291 \mu\text{M}$ ; red curve).

Data S1. Replicated western blots, Related to Figure 4 and Figure S4.

A Figure 4A replicate 2

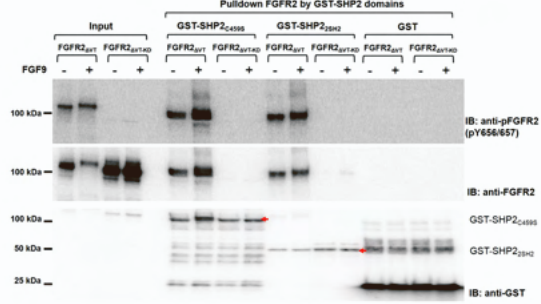

Figure 4A replicate 3

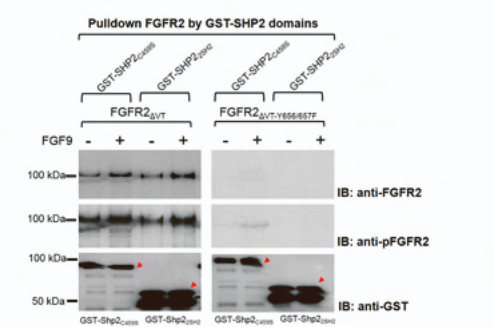

B Figure 4B replicate 2

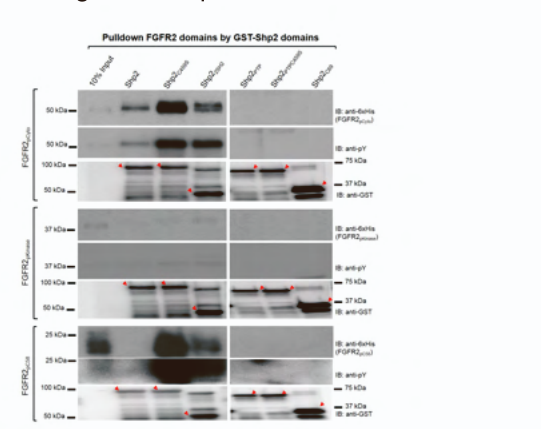

E Figure S4E replicate 2

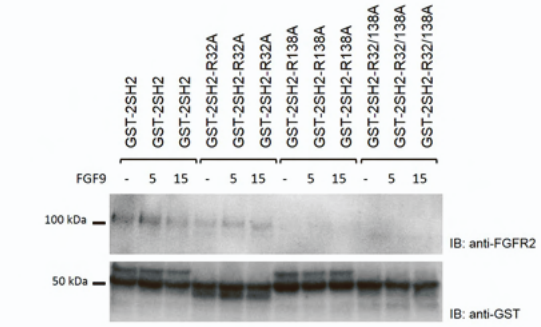

C

Figure 4C replicate 2

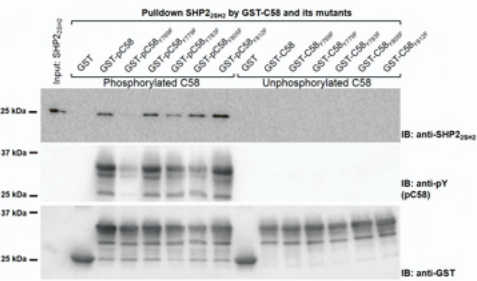

Figure 4C replicate 3

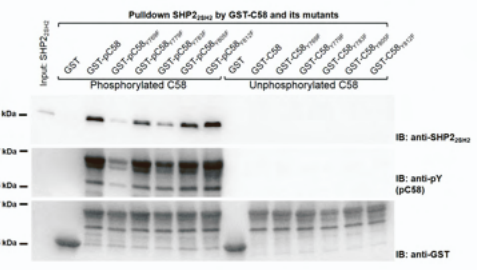

Figure 4C replicate 4

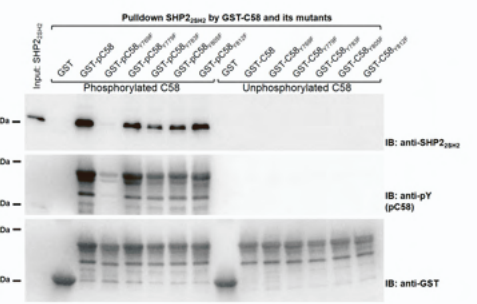

D

Figure 4D replicate 2

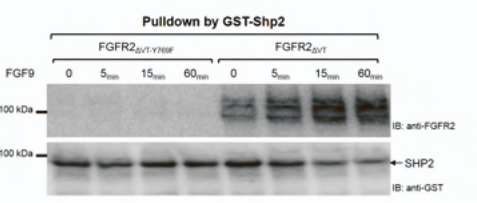

Figure 4D replicate 3

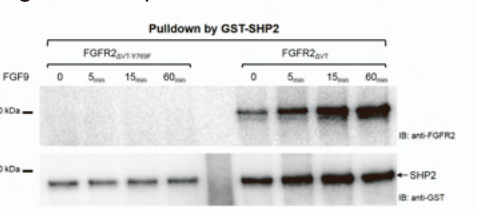

Data S2. Replicated western blots, Related to Figure 5 and Figure 6.

A

Figure 5E replicate 2

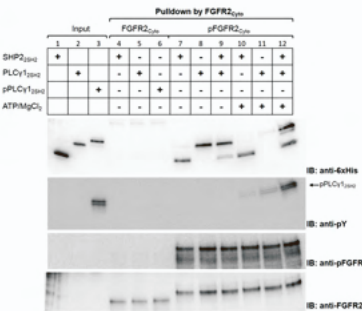

Figure 5E replicate 3

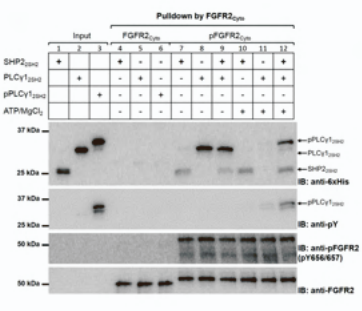

B

Figure 6D replicate 2

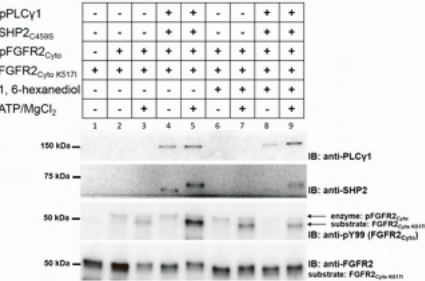

Figure 6D replicate 3

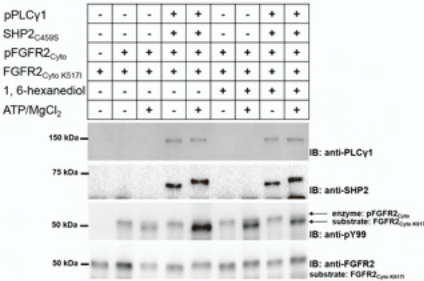

Figure 6D replicate 4

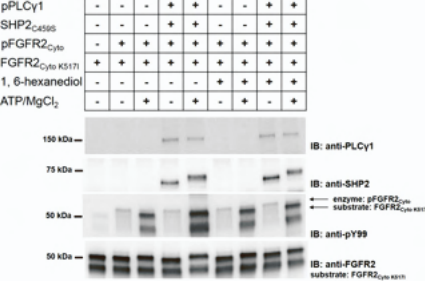

Figure 6D replicate 5

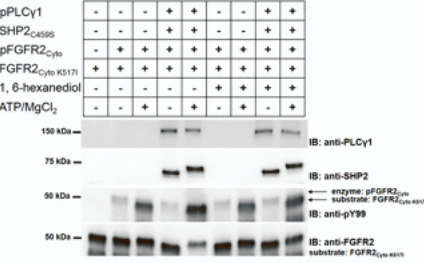

C

Figure 6E replicate 2

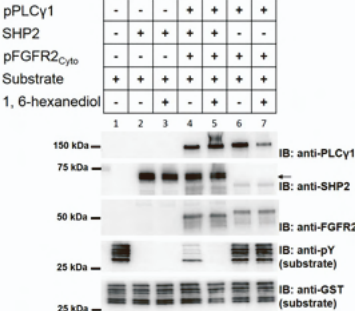

D

Figure 6F replicate 2

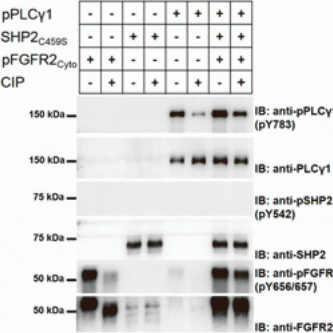



**Data S3. Replicated western blots, Related to Figure 7 and Figure S7.**

**A**

Figure 7A (MCF7) replicate 2

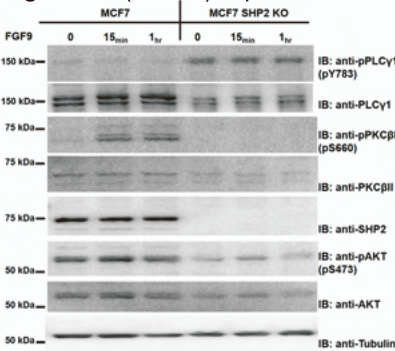

Figure 7A (MCF7) replicate 3

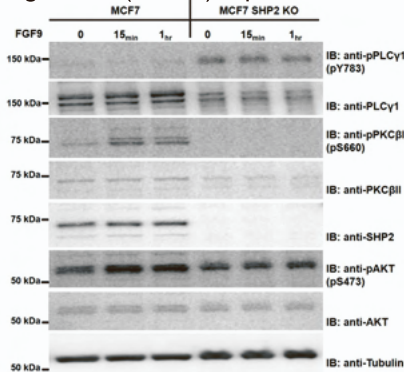

Figure 7A (A431) replicate 2

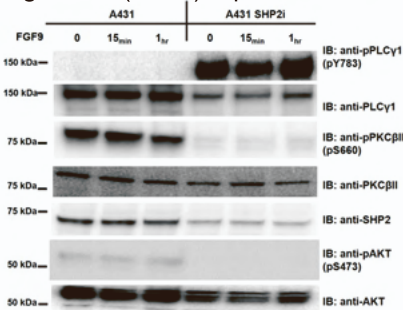

**B**

Figure 7D replicate 2

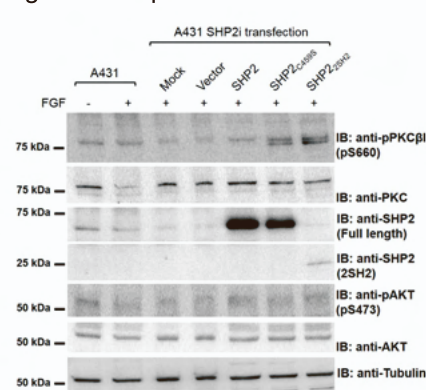

**C**

Figure 7E replicate 2

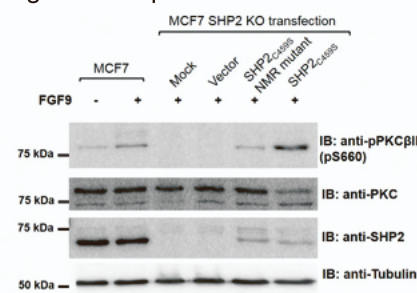

Figure 7E replicate 3

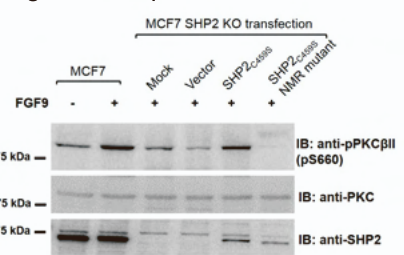

Figure 7D replicate 3

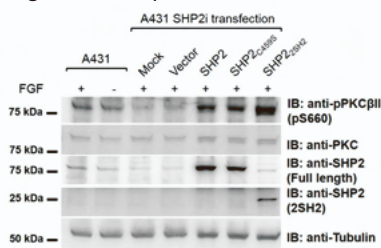

**E**

Figure S7B replicate 2

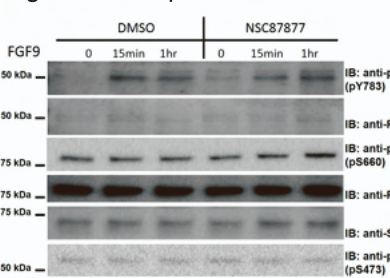

Figure S7B replicate 3

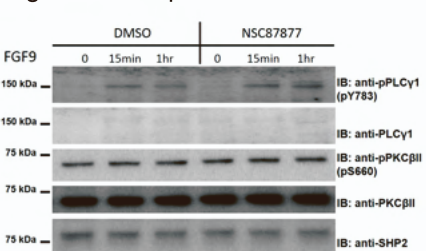

**D**

Figure S7A replicate 2

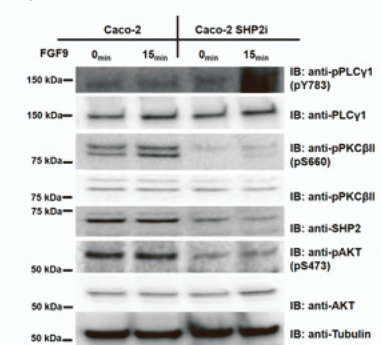

**F**

Figure S7C replicate 2 and 3

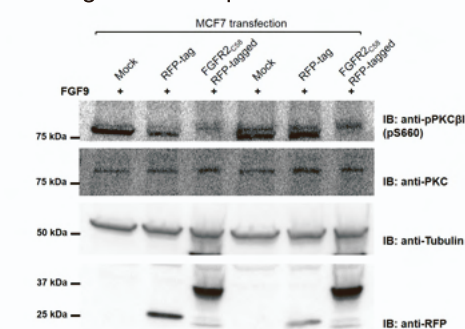

Supplement: mmc1 [file mmc1.pdf]
